# Supplementary material for: In-Depth Two-Year Study of Phenolic Profile Variability among Olive Oils from Autochthonous and Mediterranean Varieties in Morocco, as Revealed by a LC-MS Chemometric Profiling Approach
Source: PubMed Central journal article supplement (PMC5297687; doi:10.3390/ijms18010052), 2016-12-28
Supplement: ijms-18-00052-s001.pdf [file ijms-18-00052-s001.pdf]

## Supplementary Materials: In-Depth Two-Year Study of Phenolic Profile Variability among Olive Oils from Autochthonous and Mediterranean Varieties in Morocco, as Revealed by a LC-MS Chemometric Profiling Approach

Aadil Bajoub, Santiago Medina-Rodríguez, Lucía Olmo-García, El Amine Ajal, Romina P. Monasterio, Hafida Hanine, Alberto Fernández-Gutiérrez and Alegría Carrasco-Pancorbo

**Table S1.** Classification matrix, according to LDA, for the varietal origin discrimination between VOOs from “Picholine Marocaine” and Mediterranean cultivars (varietal origin discriminant Model 1).

| Classification         | Arbequina | Arbosana  | Cornicabra | Frantoio  | Hojiblanca | Koroneiki | Manzanilla | Picholine Marocaine | Picholine de Languedoc | Picual    | Total      | % Correct     |
|------------------------|-----------|-----------|------------|-----------|------------|-----------|------------|---------------------|------------------------|-----------|------------|---------------|
| Arbequina              | 16        | 0         | 0          | 0         | 0          | 0         | 0          | 0                   | 0                      | 0         | 16         | 100.00%       |
| Arbosana               | 1         | 13        | 0          | 0         | 0          | 0         | 0          | 1                   | 0                      | 0         | 15         | 86.67%        |
| Cornicabra             | 0         | 0         | 11         | 0         | 0          | 0         | 0          | 0                   | 0                      | 0         | 11         | 100.00%       |
| Frantoio               | 0         | 0         | 0          | 15        | 0          | 0         | 0          | 1                   | 0                      | 0         | 16         | 93.75%        |
| Hojiblanca             | 0         | 0         | 0          | 0         | 13         | 0         | 0          | 0                   | 0                      | 0         | 13         | 100.00%       |
| Koroneiki              | 0         | 0         | 0          | 0         | 0          | 18        | 0          | 0                   | 0                      | 0         | 18         | 100.00%       |
| Manzanilla             | 0         | 0         | 0          | 0         | 0          | 0         | 17         | 0                   | 0                      | 0         | 17         | 100.00%       |
| Picholine Marocaine    | 0         | 0         | 0          | 0         | 0          | 0         | 0          | 24                  | 0                      | 0         | 24         | 100.00%       |
| Picholine de Languedoc | 0         | 0         | 0          | 0         | 0          | 0         | 0          | 3                   | 17                     | 0         | 20         | 85.00%        |
| Picual                 | 0         | 0         | 0          | 0         | 0          | 0         | 0          | 1                   | 1                      | 16        | 18         | 88.89%        |
| <b>Total</b>           | <b>17</b> | <b>13</b> | <b>11</b>  | <b>15</b> | <b>13</b>  | <b>18</b> | <b>17</b>  | <b>30</b>           | <b>18</b>              | <b>16</b> | <b>168</b> | <b>95.24%</b> |
| Cross-Validation       | Arbequina | Arbosana  | Cornicabra | Frantoio  | Hojiblanca | Koroneiki | Manzanilla | Picholine Marocaine | Picholine de Languedoc | Picual    | Total      | % Correct     |
| Arbequina              | 14        | 0         | 1          | 1         | 0          | 0         | 0          | 0                   | 0                      | 0         | 16         | 87.50%        |
| Arbosana               | 1         | 13        | 0          | 0         | 0          | 0         | 0          | 1                   | 0                      | 0         | 15         | 86.67%        |
| Cornicabra             | 0         | 0         | 11         | 0         | 0          | 0         | 0          | 0                   | 0                      | 0         | 11         | 100.00%       |
| Frantoio               | 0         | 0         | 0          | 15        | 0          | 0         | 0          | 1                   | 0                      | 0         | 16         | 93.75%        |
| Hojiblanca             | 0         | 0         | 0          | 0         | 13         | 0         | 0          | 0                   | 0                      | 0         | 13         | 100.00%       |
| Koroneiki              | 0         | 0         | 0          | 0         | 1          | 17        | 0          | 0                   | 0                      | 0         | 18         | 94.44%        |
| Manzanilla             | 0         | 0         | 0          | 0         | 0          | 0         | 17         | 0                   | 0                      | 0         | 17         | 100.00%       |
| Picholine Marocaine    | 0         | 0         | 0          | 0         | 0          | 0         | 0          | 24                  | 0                      | 0         | 24         | 100.00%       |
| Picholine de Languedoc | 1         | 0         | 0          | 0         | 0          | 0         | 0          | 3                   | 16                     | 0         | 20         | 80.00%        |
| Picual                 | 0         | 0         | 0          | 0         | 0          | 0         | 0          | 1                   | 1                      | 16        | 18         | 88.89%        |
| <b>Total</b>           | <b>16</b> | <b>13</b> | <b>12</b>  | <b>16</b> | <b>14</b>  | <b>17</b> | <b>17</b>  | <b>30</b>           | <b>17</b>              | <b>16</b> | <b>168</b> | <b>92.86%</b> |

**Table S2.** Classification matrix, according to LDA, for the botanical origin discrimination between VOOs from “Picholine Marocaine” and Moroccan cultivars (varietal origin discriminant Model 2).

| <b>Classification</b>      | <b>Dahbia</b> | <b>Haouzia</b> | <b>Menara</b> | <b>Picholine Marocaine</b> | <b>Total</b> | <b>% Correct</b> |
|----------------------------|---------------|----------------|---------------|----------------------------|--------------|------------------|
| <b>Dahbia</b>              | 11            | 0              | 0             | 0                          | 11           | 100.00%          |
| <b>Haouzia</b>             | 0             | 11             | 0             | 0                          | 11           | 100.00%          |
| <b>Menara</b>              | 0             | 0              | 12            | 0                          | 12           | 100.00%          |
| <b>Picholine Marocaine</b> | 0             | 0              | 0             | 24                         | 24           | 100.00%          |
| <b>Total</b>               | <b>11</b>     | <b>11</b>      | <b>12</b>     | <b>24</b>                  | <b>58</b>    | <b>100.00%</b>   |
| <b>Cross-validation</b>    | <b>Dahbia</b> | <b>Haouzia</b> | <b>Menara</b> | <b>Picholine Marocaine</b> | <b>Total</b> | <b>% Correct</b> |
| <b>Dahbia</b>              | 11            | 0              | 0             | 0                          | 11           | 100.00%          |
| <b>Haouzia</b>             | 0             | 9              | 1             | 1                          | 11           | 81.82%           |
| <b>Menara</b>              | 0             | 1              | 7             | 4                          | 12           | 58.33%           |
| <b>Picholine Marocaine</b> | 0             | 0              | 1             | 23                         | 24           | 95.83%           |
| <b>Total</b>               | <b>11</b>     | <b>10</b>      | <b>9</b>      | <b>28</b>                  | <b>58</b>    | <b>86.21%</b>    |

**Table S3.** Classification matrix, according to LDA, for the botanical origin discrimination between VOOs obtained from Mediterranean and Moroccan cultivars (varietal origin discriminant Model 3).

| Classification         | Arbequina | Arbosana  | Cornicabra | Dahbia    | Frantoio  | Hojiblanca | Haouzia   | Koroneiki | Manzanilla | Menara    | Picholine de Languedoc | Picual    | Total      | % Correct     |
|------------------------|-----------|-----------|------------|-----------|-----------|------------|-----------|-----------|------------|-----------|------------------------|-----------|------------|---------------|
| Arbequina              | 15        | 0         | 0          | 0         | 0         | 0          | 0         | 0         | 0          | 0         | 1                      | 0         | 16         | 93.75%        |
| Arbosana               | 1         | 13        | 0          | 0         | 0         | 0          | 0         | 0         | 0          | 0         | 1                      | 0         | 15         | 86.67%        |
| Cornicabra             | 0         | 0         | 11         | 0         | 0         | 0          | 0         | 0         | 0          | 0         | 0                      | 0         | 11         | 100.00%       |
| Dahbia                 | 0         | 0         | 0          | 11        | 0         | 0          | 0         | 0         | 0          | 0         | 0                      | 0         | 11         | 100.00%       |
| Frantoio               | 0         | 0         | 0          | 0         | 15        | 0          | 0         | 0         | 0          | 0         | 1                      | 0         | 16         | 93.75%        |
| Hojiblanca             | 0         | 0         | 0          | 0         | 0         | 13         | 0         | 0         | 0          | 0         | 0                      | 0         | 13         | 100.00%       |
| Haouzia                | 0         | 0         | 1          | 0         | 0         | 0          | 9         | 0         | 0          | 1         | 0                      | 0         | 11         | 81.82%        |
| Koroneiki              | 0         | 0         | 0          | 0         | 0         | 0          | 0         | 17        | 0          | 0         | 0                      | 1         | 18         | 94.44%        |
| Manzanilla             | 0         | 2         | 0          | 0         | 0         | 0          | 0         | 0         | 15         | 0         | 0                      | 0         | 17         | 88.24%        |
| Menara                 | 0         | 0         | 0          | 0         | 0         | 0          | 1         | 0         | 0          | 11        | 0                      | 0         | 12         | 91.67%        |
| Picholine de Languedoc | 0         | 0         | 0          | 0         | 1         | 0          | 0         | 0         | 0          | 0         | 19                     | 0         | 20         | 95.00%        |
| Picual                 | 0         | 0         | 0          | 0         | 0         | 0          | 0         | 0         | 0          | 0         | 1                      | 17        | 18         | 94.44%        |
| <b>Total</b>           | <b>16</b> | <b>15</b> | <b>12</b>  | <b>11</b> | <b>16</b> | <b>13</b>  | <b>10</b> | <b>17</b> | <b>15</b>  | <b>12</b> | <b>23</b>              | <b>18</b> | <b>178</b> | <b>93.26%</b> |
| Cross-validation       | Arbequina | Arbosana  | Cornicabra | Dahbia    | Frantoio  | Hojiblanca | Haouzia   | Koroneiki | Manzanilla | Menara    | Picholine de Languedoc | Picual    | Total      | % Correct     |
| Arbequina              | 15        | 0         | 0          | 0         | 0         | 0          | 0         | 0         | 0          | 0         | 1                      | 0         | 16         | 93.75%        |
| Arbosana               | 1         | 11        | 0          | 0         | 0         | 0          | 0         | 0         | 0          | 1         | 1                      | 1         | 15         | 73.33%        |
| Cornicabra             | 0         | 0         | 11         | 0         | 0         | 0          | 0         | 0         | 0          | 0         | 0                      | 0         | 11         | 100.00%       |
| Dahbia                 | 0         | 0         | 0          | 11        | 0         | 0          | 0         | 0         | 0          | 0         | 0                      | 0         | 11         | 100.00%       |
| Frantoio               | 0         | 0         | 0          | 0         | 14        | 0          | 0         | 0         | 0          | 1         | 1                      | 0         | 16         | 87.50%        |
| Hojiblanca             | 0         | 0         | 0          | 0         | 0         | 13         | 0         | 0         | 0          | 0         | 0                      | 0         | 13         | 100.00%       |
| Haouzia                | 0         | 0         | 1          | 0         | 0         | 0          | 6         | 0         | 1          | 3         | 0                      | 0         | 11         | 54.55%        |
| Koroneiki              | 0         | 0         | 0          | 0         | 0         | 0          | 0         | 17        | 0          | 0         | 0                      | 1         | 18         | 94.44%        |
| Manzanilla             | 0         | 2         | 0          | 0         | 0         | 0          | 0         | 0         | 15         | 0         | 0                      | 0         | 17         | 88.24%        |
| Menara                 | 0         | 0         | 0          | 0         | 1         | 0          | 4         | 0         | 0          | 6         | 1                      | 0         | 12         | 50.00%        |
| Picholine de Languedoc | 0         | 0         | 0          | 0         | 1         | 0          | 1         | 1         | 0          | 1         | 16                     | 0         | 20         | 80.00%        |
| Picual                 | 0         | 0         | 0          | 0         | 0         | 0          | 1         | 0         | 0          | 0         | 1                      | 16        | 18         | 88.89%        |
| <b>Total</b>           | <b>16</b> | <b>13</b> | <b>12</b>  | <b>11</b> | <b>16</b> | <b>13</b>  | <b>12</b> | <b>18</b> | <b>16</b>  | <b>12</b> | <b>21</b>              | <b>18</b> | <b>178</b> | <b>84.83%</b> |
